# Supplementary material
Source: PubMed Central journal article supplement (PMC2427170)
Supplement: mmc1.pdf [file mmc1.pdf]

## Simple and Efficient Analysis of Disease Association With Missing Genotype Data

D. Y. Lin, Y. Hu and B. E. Huang

**Table S1. Bias of Log Odds Ratio Estimates and Coverage Probabilities (CP) of 99% Confidence Intervals for Untyped SNPs Under Additive Models for 4 Regions of 5 SNPs on Chromosome 18 of the HapMap CEU Sample**

|   | Odds Ratio = 1 |       | Odds Ratio = 1.4 |       |
|---|----------------|-------|------------------|-------|
|   | Bias           | CP    | Bias             | CP    |
| A | -0.004         | 0.989 | -0.036           | 0.985 |
| B | -0.001         | 0.992 | -0.016           | 0.988 |
| C | -0.003         | 0.990 | -0.005           | 0.990 |
| D | -0.002         | 0.991 | -0.012           | 0.988 |

Note: (A) SNP 21 in the region of SNPs 20-24 with MAF of 0.40 and  $R_s^2$  of 0.24; (B) SNP 22 in the region of SNPs 20-24 with MAF of 0.25 and  $R_s^2$  of 0.42; (C) SNP 26 in the region of SNPs 24-28 with MAF of 0.25 and  $R_s^2$  of 0.85; (D) SNP 65 in the region of SNPs 63-67 with MAF of 0.37 and  $R_s^2$  of 0.62. For odds ratio of 1, one minus the coverage probability yields the type I error rate at the 1% nominal significance level.
